# Supplementary material for: Long Terminal Repeat Circular DNA as Markers of Active Viral Replication of Human T Lymphotropic Virus-1 in Vivo
Source: MDPI journal article supplement (doi:10.3390/v8030080), 2016-03-14
Supplement: s1 [file s1]

# Supplementary Materials: Long Terminal Repeat Circular DNA as Markers of Active Viral Replication of Human T Lymphotropic Virus-1 *in Vivo*

James M Fox, Silva Hilburn, Maria-Antonietta Demontis, David W Brighty, Maria Fernanda Rios Grassi, Bernardo Galvão-Castro, Graham P Taylor and Fabiola Martin

**Table S1.** Demographics of the patients with HTLV-1 from whom DNA samples for LTR quantification were taken.

| Demographics            | Frequency (%) | Range |
|-------------------------|---------------|-------|
| Female                  | 33 (70)       |       |
| Afro-Caribbean          | 37 (80)       |       |
| African                 | 4 (8%)        |       |
| Caucasian               | 4 (8 %)       |       |
| Persian                 | 1 (2%)        |       |
| South American          | 1 (2%)        |       |
| Age                     | Years         |       |
| Average age at sampling | 56.1          | 19–80 |

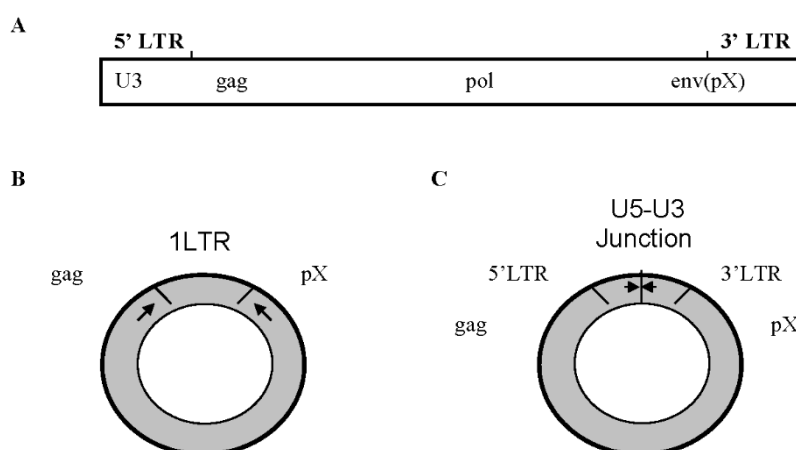

**Figure S1.** Structures of extrachromosomal DNA in HTLV infected cells and primer design rational. Linear viral DNA (A) is synthesized in the cytoplasm after cell infection and can circularise to form 1- (B) or 2-LTR DNA circles (C). 1LTR DNA circles are formed through the deletion of either LTR; 2LTR DNA circles are formed at the U3-U5 junction where the LTRs from each end of the HTLV-1 DNA connect. Specific primer pairs (arrows) were designed to selectively amplify circularised DNA (sequences are shown in Table 1). LTR: long terminal repeats; gag, pol, env(pX): gene regions coding for viral proteins.

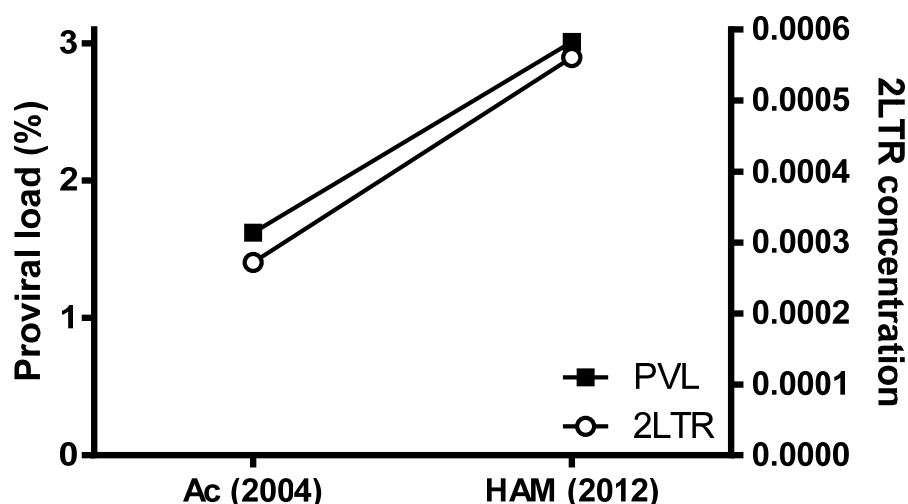

**Figure S2.** PVL and 2LTR DNA circle levels increase in an incident patient progressing from asymptomatic HTLV-1 carrier to being diagnosed with HAM. The PVL (■) and 2LTR levels (○) were quantified in PBMCs from an incident asymptomatic patient in 2004 and from the same patient after disease progression and HAM diagnosis in 2012. Incident patient demographics: male; 20 years of age at diagnosis; black ethnicity (skin colour, self-definition). His risk factors were: breast-feeding from an HTLV positive mother and his brother was also HTLV positive. Blood transfusion denied. His date of diagnosis was on his enrolment into the cohort: 10 October 2004 when he was asymptomatic. The patient was seen again on 9 May 2009 and he was still asymptomatic but Rossolimo's sign was present. Onset of symptoms: 9 September 2011 (HAM/TSP).

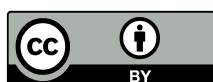

© 2016 by the authors; licensee MDPI, Basel, Switzerland. This article is an open access article distributed under the terms and conditions of the Creative Commons by Attribution (CC-BY) license (<http://creativecommons.org/licenses/by/4.0/>).
